Anesthesiology  
56:334, 1982

*In reply:*—The leaks reported by Dr. Rolbin and Dr. Wolf *et al.* are the only reported incidents of leaks in our universal mounting adapter. This system has served the needs of the delivery system for the VENTIMETER® Ventilator since its inception in 1963. Dr. Rolbin's first report of this leak was reviewed four years ago, but because of no other substantiation, was deemed to be an isolated incident.

In the last few months we have also learned of the recurrence of this problem in Dr. Rolbin's institution. As a result of these reports we are changing the pole of the universal bracket from chrome-plated brass to stain-

less steel. This will prevent the pole from developing stress cracks through the constant tightening of the universal clamp.

To purchase a replacement stainless steel pole, please contact your local representative or call toll free (800) 523-5756.

JOSEPH MOFFETT  
Product Manager  
Narco Air-Shields  
330 Jacksonville Road  
Hatboro, Pennsylvania 19040

(Accepted for publication November 11, 1981.)

#### NOTICE TO COPIERS

*The appearance of the code at the bottom of the first page of an article in this journal indicates the copyright owner's consent that copies of the article may be made for personal or internal use, or for personal or internal use of specific clients. This consent is given on the condition, however, that the copier pay the stated per-copy fee through the Copyright Clearance Center, Inc., 21 Congress Street, Salem, Massachusetts 01970, for copying beyond that permitted by Sections 107 or 108 of the U. S. Copyright Law. This consent does not extend to other kinds of copying, such as copying for general distribution, for advertising or promotional purposes, for creating new collective works, or for resale.*
